# Supplementary material
Source: HighWire-hosted journal article supplement (https://bmjopen.bmj.com/content/13/6/e067630)
Supplement: inline-supplementary-material-1 [file inline-supplementary-material-1.pdf]

## Neonatal mortality in NHS maternity units by timing and method of birth: a retrospective linked cohort study

Lucy Carty, Christopher Grollman, Rachel Plachcinski, Mario Cortina-Borja and Alison Macfarlane

[Citation detail]

DOI: [Article DOI]

### Supplementary material

Coding of all variables used in the analysis

Coding of variables used in the analysis.

*Supplementary table 1. Coding of all variables used in the analysis*

| Variable in analysis                | Original format                                               | Coding                                                                                                                                                                                                                                                                                                                                                                                                                                                                                            |
|-------------------------------------|---------------------------------------------------------------|---------------------------------------------------------------------------------------------------------------------------------------------------------------------------------------------------------------------------------------------------------------------------------------------------------------------------------------------------------------------------------------------------------------------------------------------------------------------------------------------------|
| Baby's date of birth                | Calendar date                                                 | Continuous from first to last day of study                                                                                                                                                                                                                                                                                                                                                                                                                                                        |
| Day in year of baby's date of birth | Calendar date                                                 | Continuous from 1 to 365 or 366                                                                                                                                                                                                                                                                                                                                                                                                                                                                   |
| Clock go forward/back               | Calendar date                                                 | Binary for whether clocks went forward/back that day                                                                                                                                                                                                                                                                                                                                                                                                                                              |
| Working hours (binary)              | Time of birth, calendar date                                  | Binary:<br>Working hours = 0700 to 1859 inclusive, Monday to Friday except public holidays<br>Non-working hours = all other times                                                                                                                                                                                                                                                                                                                                                                 |
| Working hours (4 categories)        | Time of birth, calendar date                                  | Four categories:<br>Working hours (weekday daytime) = 0700 to 1859, Monday to Friday except public holidays<br>Weekday night-time = 1900 to 2359, Monday to Friday except public holidays; 0000 to 0659 Tuesday to Friday except public holidays<br>Weekend/holiday daytime = 0700 to 1859 Saturday, Sunday or public holiday<br>Weekend/holiday night-time = 1900 to 2359, Saturday, Sunday or public holiday; 0000 to 0659 Saturday, Sunday, public holiday, Monday or day after public holiday |
| Gestational age                     | Completed weeks since last menstrual period, or by ultrasound | Grouped in categories:<br>22 to 28 weeks; 28 to 32 weeks; 32 to 37 weeks; 37 to 42 weeks; 42 weeks and over; Missing                                                                                                                                                                                                                                                                                                                                                                              |

|                                      |                                                                                        |                                                                                                                                                                                                                                                                                                                                                                                    |
|--------------------------------------|----------------------------------------------------------------------------------------|------------------------------------------------------------------------------------------------------------------------------------------------------------------------------------------------------------------------------------------------------------------------------------------------------------------------------------------------------------------------------------|
| Birthweight                          | Birthweight in grammes                                                                 | Grouped in categories:<br><2500; 2500–2999; 3000–3499; 3500–3999; 4000+                                                                                                                                                                                                                                                                                                            |
| Age of mother                        | Fractional years                                                                       | Continuous in completed years                                                                                                                                                                                                                                                                                                                                                      |
| Parity                               | Number of previous births                                                              | Binary nulliparous/multiparous                                                                                                                                                                                                                                                                                                                                                     |
| Ethnicity                            | 17 categories based on the ethnicity question in the 2001 Census of England and Wales  | Seventeen categories:<br>White British; White Irish; Any other White background; Mixed White & Black Caribbean; Mixed White & Black African; Mixed White & Asian; Any other Mixed background; Asian Indian; Asian Pakistani; Asian Bangladeshi; Any other Asian background; Black Caribbean; Black African; Any other Black background; Chinese; Any other ethnic group; Not Known |
| Region                               | Ten Strategic Health Authority regions in the NHS for the majority of the study period | Ten categories: North East; North West; Yorkshire/Humber; East Midlands; West Midlands; East of England; London; South East Coast; South West; South Central                                                                                                                                                                                                                       |
| Marital status at birth registration | Categories recorded at birth registration                                              | Four categories:<br>Joint registration with different address; Joint same address; Sole registration; Within marriage                                                                                                                                                                                                                                                              |
| Mother's place of birth              | Countries recorded at birth registration                                               | Grouped into seven categories:<br>United Kingdom; Other Europe; Africa; The Americas and the Caribbean; Middle East and Asia; Oceania and Antarctica; Missing                                                                                                                                                                                                                      |
| Previous caesarean birth             | Whether present (yes/no)                                                               | Binary no/any previous caesarean birth                                                                                                                                                                                                                                                                                                                                             |
| Obstetric complications*             | Whether present (yes/no)                                                               | Binary not present/present                                                                                                                                                                                                                                                                                                                                                         |

\* Hypertension, Preeclampsia, Eclampsia, Diabetes, Gestational diabetes, Malpresentation of foetus, Maternal care for disproportion, Maternal care for abnormality of pelvic organs, Polyhydramnios, Oligohydramnios, Premature rupture of membranes, Placental disorders, Placenta praevia, Premature separation of placenta, Antepartum haemorrhage, Obstructed labour, Intrapartum haemorrhage, Umbilical cord complications

#### Crude all-cause neonatal mortality rates

Crude all-cause neonatal mortality rates in the analysis population were higher during non-working hours compared with working hours (1.58 vs 1.36 per 1000 live births, rate ratio 1.17, 95% confidence interval 1.12 to 1.22) (Supplementary table 2). The crude mortality rate ratio was not significantly different from 1 for spontaneous or instrumental births and was below 1 for emergency caesarean births (0.86, 0.80 to 0.93), meaning lower crude all-cause neonatal mortality rate during non-working hours compared with working hours (3.13 vs 3.62 per 1000 live births).

Supplementary table 2. Crude all-cause neonatal mortality by time and day of birth, stratified by method of birth

|                              | Living at 28 days | Neonatal death | Total   | Rate* | Rate ratio | 95% CI       |
|------------------------------|-------------------|----------------|---------|-------|------------|--------------|
| <b>Total population</b>      |                   |                |         |       |            |              |
| Working hours                | 2325569           | 3162           | 2328731 | 1.36  |            |              |
| Non-working hours            | 3630159           | 5758           | 3635917 | 1.58  | 1.17       | 1.12 to 1.22 |
| <b>Spontaneous delivery</b>  |                   |                |         |       |            |              |
| Working hours                | 1201063           | 1647           | 1202710 | 1.37  |            |              |
| Non-working hours            | 2554815           | 3542           | 2558357 | 1.38  | 1.01       | 0.95 to 1.07 |
| <b>Instrumental delivery</b> |                   |                |         |       |            |              |
| Working hours                | 256279            | 173            | 256452  | 0.67  |            |              |
| Non-working hours            | 485085            | 340            | 485425  | 0.70  | 1.04       | 0.87 to 1.25 |
| <b>Emergency caesarean</b>   |                   |                |         |       |            |              |
| Working hours                | 310092            | 1126           | 311218  | 3.62  |            |              |
| Non-working hours            | 553239            | 1735           | 554974  | 3.13  | 0.86       | 0.8 to 0.93  |
| <b>Planned caesarean</b>     |                   |                |         |       |            |              |
| Working hours                | 552917            | 200            | 553117  | 0.36  |            |              |
| Non-working hours            | 29791             | 82             | 29873   | 2.74  | 7.61       | 5.86 to 9.8  |

\* Per 1000 live births

#### Adjusted odds of all-cause neonatal mortality by method of birth

After adjustment, the 'protective' effect of birth in non-working hours for emergency caesareans, seen in the crude rates, was no longer evident. Odds ratios for spontaneous, instrumental and emergency caesarean deliveries were not significantly different from 1 (Supplementary table 3).

Supplementary table 3. Unadjusted and adjusted odds ratios for all-cause neonatal mortality during non-working hours versus working hours by delivery type

| Odds ratio for neonatal mortality during non-working hours compared with working hours |               |              |              |              |
|----------------------------------------------------------------------------------------|---------------|--------------|--------------|--------------|
|                                                                                        | Unadjusted OR | 95% CI       | Adjusted OR* | 95% CI       |
| <b>All-cause neonatal mortality</b>                                                    |               |              |              |              |
| Spontaneous delivery                                                                   | 1.01          | 0.95 to 1.07 | 0.99         | 0.93 to 1.06 |
| Instrumental delivery                                                                  | 1.04          | 0.87 to 1.25 | 1.11         | 0.91 to 1.34 |
| Emergency caesarean                                                                    | 0.86          | 0.80 to 0.93 | 1.06         | 0.98 to 1.14 |

\* Adjusted for baby's sex, gestational age, birthweight, mode of onset of labour, geographical region, NHS trust, baby's ethnicity, baby's date of birth, maternal age and maternal parity, as well as yearly harmonic terms for day of year of the birth.

### Obstetric risk factor characteristics for emergency caesareans without labour

We compared obstetric risk factor characteristics for emergency caesareans without labour during working and non-working hours (supplementary materials) (Supplementary table 4).

*Supplementary table 4. Obstetric characteristics and risk factors for emergency caesareans without labour by working and non-working hours*

| Characteristics and risk factors | Level                          | Working hours | %    | Non-working hours | %    | p-value | SMD   |
|----------------------------------|--------------------------------|---------------|------|-------------------|------|---------|-------|
| N                                |                                | 60,202        |      | 71,700            |      |         |       |
| Baby's sex                       | F                              | 28,505        | 47.3 | 33,670            | 47.0 | 0.160   | 0.008 |
|                                  | M                              | 31,697        | 52.7 | 38,030            | 53.0 |         |       |
| Gestational age                  | 22 to 28 weeks                 | 1,127         | 1.9  | 1,439             | 2.0  | <0.001  | 0.034 |
|                                  | 28 to 32 weeks                 | 4,182         | 6.9  | 4,926             | 6.9  |         |       |
|                                  | 32 to 37 weeks                 | 14,368        | 23.9 | 17,167            | 23.9 |         |       |
|                                  | 37 to 42 weeks                 | 38,228        | 63.5 | 45,008            | 62.8 |         |       |
|                                  | 42+ weeks                      | 2,062         | 3.4  | 2,880             | 4.0  |         |       |
|                                  | Missing                        | 235           | 0.4  | 280               | 0.4  |         |       |
| Birthweight                      | Under 2,500                    | 16,653        | 27.7 | 20,629            | 28.8 | <0.001  | 0.054 |
|                                  | 2,500-2,999                    | 11,214        | 18.6 | 14,367            | 20.0 |         |       |
|                                  | 3,000-3,499                    | 15,229        | 25.3 | 17,638            | 24.6 |         |       |
|                                  | 3,500-3,999                    | 10,759        | 17.9 | 12,083            | 16.9 |         |       |
|                                  | 4,000 and over                 | 5,156         | 8.6  | 5,691             | 7.9  |         |       |
|                                  | Missing or unfeasible          | 1,191         | 2.0  | 1,292             | 1.8  |         |       |
| Maternal age                     | Under 20                       | 1,899         | 3.2  | 2,697             | 3.8  | <0.001  | 0.060 |
|                                  | 20-24                          | 8,229         | 13.7 | 10,529            | 14.7 |         |       |
|                                  | 25-29                          | 14,603        | 24.3 | 18,051            | 25.2 |         |       |
|                                  | 30-34                          | 18,359        | 30.5 | 21,420            | 29.9 |         |       |
|                                  | 35-39                          | 12,920        | 21.5 | 14,444            | 20.1 |         |       |
|                                  | Over 40                        | 4,192         | 7.0  | 4,559             | 6.4  |         |       |
| Parity                           | Nulliparous                    | 22,316        | 37.1 | 29,730            | 41.5 | <0.001  | 0.091 |
|                                  | Moderate: 1 to 4               | 35,249        | 8.6  | 38,885            | 54.2 |         |       |
|                                  | High: 5 to 9                   | 2,511         | 4.2  | 2,940             | 4.1  |         |       |
|                                  | Very high: 10 to 14            | 111           | 0.2  | 132               | 0.2  |         |       |
|                                  | Extreme, unfeasible or missing | X             | 0.0  | X                 | 0.0  |         |       |
| Ethnicity                        | White British                  | 35,770        | 59.4 | 41,519            | 57.9 | <0.001  | 0.041 |
|                                  | White Irish                    | 427           | 0.7  | 537               | 0.7  |         |       |
|                                  | Any other White background     | 3,946         | 6.6  | 4,714             | 6.6  |         |       |
|                                  | Mixed White & Black Caribbean  | 581           | 1.0  | 765               | 1.1  |         |       |

|                                      |                                      |        |      |        |      |        |       |
|--------------------------------------|--------------------------------------|--------|------|--------|------|--------|-------|
|                                      | Mixed White & Black African          | 427    | 0.7  | 491    | 0.7  |        |       |
|                                      | Mixed White & Asian                  | 670    | 1.1  | 814    | 1.1  |        |       |
|                                      | Any other Mixed background           | 1,064  | 1.8  | 1,365  | 1.9  |        |       |
|                                      | Asian Indian                         | 2,349  | 3.9  | 3,056  | 4.3  |        |       |
|                                      | Asian Pakistani                      | 2,910  | 4.8  | 3,706  | 5.2  |        |       |
|                                      | Asian Bangladeshi                    | 1,157  | 1.9  | 1,500  | 2.1  |        |       |
|                                      | Any other Asian background           | 1,171  | 1.9  | 1,352  | 1.9  |        |       |
|                                      | Black Caribbean                      | 772    | 1.3  | 991    | 1.4  |        |       |
|                                      | Black African                        | 3,377  | 5.6  | 4,262  | 5.9  |        |       |
|                                      | Any other Black background           | 609    | 1.0  | 737    | 1.0  |        |       |
|                                      | Chinese                              | 239    | 0.4  | 275    | 0.4  |        |       |
|                                      | Any other ethnic group               | 1,378  | 2.3  | 1,698  | 2.4  |        |       |
|                                      | Not Known                            | 3,355  | 5.6  | 3,918  | 5.5  |        |       |
| Region                               | North East                           | 2,053  | 3.4  | 2,405  | 3.4  | <0.001 | 0.080 |
|                                      | North West                           | 10,040 | 16.7 | 12,628 | 17.6 |        |       |
|                                      | Yorkshire/Humber                     | 4,509  | 7.5  | 5,325  | 7.4  |        |       |
|                                      | East Midlands                        | 2,974  | 4.9  | 3,082  | 4.3  |        |       |
|                                      | West Midlands                        | 8,753  | 14.5 | 12,053 | 16.8 |        |       |
|                                      | East of England                      | 6,423  | 10.7 | 7,572  | 10.6 |        |       |
|                                      | London                               | 12,590 | 20.9 | 14,129 | 19.7 |        |       |
|                                      | South East Coast                     | 4,254  | 7.1  | 5,047  | 7.0  |        |       |
|                                      | South West                           | 3,589  | 6    | 4,059  | 5.7  |        |       |
|                                      | South Central                        | 5,017  | 8.3  | 5,400  | 7.5  |        |       |
| Marital status at birth registration | Joint registration different address | 5,524  | 9.2  | 7,082  | 9.9  | <0.001 | 0.045 |
|                                      | Joint registration same address      | 16,280 | 27   | 20,222 | 28.2 |        |       |
|                                      | Sole registration                    | 3,749  | 6.2  | 4,702  | 6.6  |        |       |
|                                      | Within marriage                      | 34,649 | 57.6 | 39,694 | 55.4 |        |       |
| Mother's place of birth              | United Kingdom                       | 42,735 | 71   | 50,128 | 69.9 | <0.001 | 0.028 |
|                                      | Other Europe                         | 4,070  | 6.8  | 4,997  | 7.0  |        |       |
|                                      | Africa                               | 5,022  | 8.3  | 6,242  | 8.7  |        |       |
|                                      | The Americas and the Caribbean       | 1,096  | 1.8  | 1,258  | 1.8  |        |       |
|                                      | Asia and Middle East                 | 6,955  | 11.6 | 8,733  | 12.2 |        |       |
|                                      | Oceania, Antarctica and other        | 298    | 0.5  | 304    | 0.4  |        |       |
|                                      | Missing                              | 26     | 0.0  | 38     | 0.1  |        |       |
| Previous caesarean                   | Yes                                  | 19,030 | 31.6 | 18,119 | 25.3 | <0.001 | 0.141 |

|                                                |     |        |      |        |      |        |        |
|------------------------------------------------|-----|--------|------|--------|------|--------|--------|
| Hypertension                                   | Yes | 942    | 1.6  | 956    | 1.3  | <0.001 | 0.019  |
| Preeclampsia                                   | Yes | 6,902  | 11.5 | 8,391  | 11.7 | 0.181  | 0.007  |
| Eclampsia                                      | Yes | 294    | 0.5  | 352    | 0.5  | 0.978  | <0.001 |
| Diabetes                                       | Yes | 1,600  | 2.7  | 1,463  | 2.0  | <0.001 | 0.041  |
| Gestational diabetes                           | Yes | 3,333  | 5.5  | 3,401  | 4.7  | <0.001 | 0.036  |
| Malpresentation of foetus                      | Yes | 9,605  | 16   | 10,639 | 14.8 | <0.001 | 0.031  |
| Maternal care for disproportion                | Yes | 104    | 0.2  | 155    | 0.2  | 0.087  | 0.010  |
| Maternal care for abnormality of pelvic organs | Yes | 17,269 | 28.7 | 16,217 | 22.6 | <0.001 | 0.139  |
| Polyhydramnios                                 | Yes | 1,301  | 2.2  | 1,377  | 1.9  | 0.002  | 0.017  |
| Oligohydramnios                                | Yes | 2,014  | 3.3  | 1,973  | 2.8  | <0.001 | 0.035  |
| Premature rupture of membranes                 | Yes | 5,874  | 9.8  | 8,560  | 11.9 | <0.001 | 0.070  |
| Placental disorders                            | Yes | 1,375  | 2.3  | 1,577  | 2.2  | 0.310  | 0.006  |
| Placenta praevia                               | Yes | 3,374  | 5.6  | 3,436  | 4.8  | <0.001 | 0.037  |
| Premature separation of placenta               | Yes | 1,831  | 3    | 3,305  | 4.6  | <0.001 | 0.082  |
| Antepartum haemorrhage                         | Yes | 2,178  | 3.6  | 3,327  | 4.6  | <0.001 | 0.051  |
| Obstructed labour                              | Yes | 3,280  | 5.4  | 4,502  | 6.3  | <0.001 | 0.035  |
| Intrapartum haemorrhage                        | Yes | 410    | 0.7  | 570    | 0.8  | 0.018  | 0.013  |
| Umbilical cord complications                   | Yes | 1,166  | 1.9  | 1,864  | 2.6  | <0.001 | 0.045  |

SMD = standardised mean difference; X = suppressed due to count(s) below 10

#### Point estimates from final fully adjusted model

Supplementary table 5. Odds ratios for neonatal mortality attributed to anoxia, asphyxia or trauma among emergency caesarean births without labour from 2005 to 2014

|                                        | Odds ratio | 95% CI lower | 95% CI upper |
|----------------------------------------|------------|--------------|--------------|
| Spline of baby's date of birth         | 1.415      | 0.586        | 3.416        |
| Spline of baby's date of birth squared | 0.611      | 0.386        | 0.967        |
| Sine term related to day-in-year       | 0.994      | 0.833        | 1.185        |
| Cosine term related to day-in-year     | 1.031      | 0.867        | 1.226        |
| Clocks go forward*                     | 0          | NA           | NA           |
| Clocks go back*                        | 0          | NA           | NA           |
| Weekday daytime                        | Ref        |              |              |
| Weekday night-time                     | 1.558      | 1.152        | 2.106        |
| Weekend/holiday daytime                | 0.954      | 0.626        | 1.456        |
| Weekend/holiday night-time             | 1.753      | 1.242        | 2.473        |

|                                           |       |       |       |
|-------------------------------------------|-------|-------|-------|
| Gestational age 22 to 28 weeks            | 0.608 | 0.212 | 1.747 |
| Gestational age 28 to 32 weeks            | 0.775 | 0.417 | 1.440 |
| Gestational age 32 to 37 weeks            | 1.109 | 0.773 | 1.590 |
| Gestational age 37 to 42 weeks            | Ref   |       |       |
| Gestational age 42 weeks and over         | 0.348 | 0.128 | 0.948 |
| Gestational age missing                   | 0.825 | 0.113 | 6.034 |
| Birth weight under 2,500                  | 0.981 | 0.623 | 1.545 |
| Birth weight 2,500 to 2,999               | 1.367 | 0.931 | 2.008 |
| Birth weight 3,000 to 3,499               | Ref   |       |       |
| Birth weight 3,500 to 3,999               | 1.136 | 0.744 | 1.733 |
| Birth weight 4,000 and over               | 1.353 | 0.809 | 2.261 |
| Birth weight missing or unfeasible        | 2.774 | 1.395 | 5.517 |
| North East                                | 1.349 | 0.613 | 2.967 |
| North West                                | 1.090 | 0.658 | 1.807 |
| Yorkshire/Humber                          | 2.132 | 1.244 | 3.653 |
| East Midlands                             | 1.812 | 0.884 | 3.716 |
| West Midlands                             | 1.343 | 0.804 | 2.244 |
| East of England                           | 1.322 | 0.761 | 2.295 |
| London                                    | Ref   |       |       |
| South East Coast                          | 1.121 | 0.577 | 2.178 |
| South Central                             | 1.700 | 0.967 | 2.990 |
| South West                                | 1.619 | 0.880 | 2.978 |
| Spline of age of mother                   | 0.536 | 0.161 | 1.787 |
| Spline of age of mother squared           | 0.175 | 0.022 | 1.371 |
| Nulliparous                               | 1.184 | 0.906 | 1.547 |
| Multiparous                               | Ref   |       |       |
| Parity missing*                           | 0     | NA    | NA    |
| Placental abruption                       | 4.526 | 3.279 | 6.248 |
| Maternal treatment for pelvic abnormality | 0.357 | 0.229 | 0.558 |
| Malpresentation                           | 0.279 | 0.155 | 0.500 |
| Preeclampsia                              | 0.306 | 0.160 | 0.585 |
| Postpartum haemorrhage                    | 1.704 | 1.287 | 2.257 |
| Antepartum haemorrhage                    | 2.282 | 1.547 | 3.367 |

\* No deaths; Ref = reference category; CI = confidence interval

#### Neonatal deaths attributed to anoxia, asphyxia or trauma by year

The number of births each year by emergency caesarean without labour rose from 2005 to 2014, with a larger rise in births during non-working hours than in working hours. Applying the number needed to harm of 1258 to those births during weeknights and 933 to those births during weekend/holiday nights gives a number of annual deaths potentially associated with birth during non-working hours ranging from 3.2 deaths in 2005 to 6.2 deaths in 2014 (Supplementary table 6).

*Supplementary table 6. Number of deaths per year attributable to anoxia, asphyxia or trauma potentially associated with birth during non-working hours, among emergency caesarean deliveries without labour*

| Birth year | Weekday daytime | Weekday night-time<br>(NNH = 1258) | Weekend/holiday daytime (NNH = 15,373)* |               | Weekend/holiday night-time (NNH = 933) |               | Total excess deaths |      |
|------------|-----------------|------------------------------------|-----------------------------------------|---------------|----------------------------------------|---------------|---------------------|------|
|            | N births        | N births                           | N births                                | Excess deaths | N births                               | Excess deaths |                     |      |
| 2005       | 4416            | 2317                               | 1.8                                     | 1435          | 0.1                                    | 1252          | 1.3                 | 3.2  |
| 2006       | 4650            | 2448                               | 1.9                                     | 1426          | 0.1                                    | 1273          | 1.4                 | 3.3  |
| 2007       | 4623            | 2378                               | 1.9                                     | 1382          | 0.1                                    | 1223          | 1.3                 | 3.2  |
| 2008       | 4716            | 2493                               | 2.0                                     | 1535          | 0.1                                    | 1277          | 1.4                 | 3.4  |
| 2009       | 6020            | 3505                               | 2.8                                     | 2020          | 0.1                                    | 1873          | 2.0                 | 4.8  |
| 2010       | 6450            | 3610                               | 2.9                                     | 2087          | 0.1                                    | 1931          | 2.1                 | 4.9  |
| 2011       | 6855            | 3920                               | 3.1                                     | 2385          | 0.2                                    | 2159          | 2.3                 | 5.4  |
| 2012       | 7336            | 4204                               | 3.3                                     | 2581          | 0.2                                    | 2324          | 2.5                 | 5.8  |
| 2013       | 7455            | 4200                               | 3.3                                     | 2509          | 0.2                                    | 2330          | 2.5                 | 5.8  |
| 2014       | 7681            | 4483                               | 3.6                                     | 2708          | 0.2                                    | 2432          | 2.6                 | 6.2  |
| Total      |                 |                                    | 26.7                                    |               | NA                                     |               | 19.4                | 46.0 |

\* Not included in total as the association of birth during weekend and holiday daytimes with neonatal mortality attributed to anoxia, asphyxia or trauma was not significant

\*\* N births / NNH (number needed to harm)
